# Supplementary material
Source: PubMed Central journal article supplement (PMC7965727)
Supplement: 2280_table.pdf [file 2280_table.pdf]

**On-Line Table: PCT parameters and histologic assessment of biopsy specimens**

| Patient/<br>Specimen No. | Cellularity<br>Score | MVD | MVCP | WHO<br>Grade | VEGFR-2 <sup>a</sup> | CBV<br>(mL/100 g) | CBF<br>(mL/100 g/min) | MTT<br>(second) | PS<br>(mL/100 g/min) |
|--------------------------|----------------------|-----|------|--------------|----------------------|-------------------|-----------------------|-----------------|----------------------|
| 1/1                      | 3                    | 3   | 0    | III          |                      | 4.12              | 45.57                 | 7.31            | 2.98                 |
| 1/2                      | 3                    | 3   | 0    | III          |                      | 5.15              | 110.81                | 3.66            | 1.20                 |
| 2/3                      | 4                    | 1   | 3    | IV           |                      | 5.69              | 221.67                | 8.17            | 4.12                 |
| 3/4                      | 3                    | 2   | 2    | IV           |                      | 1.99              | 53.25                 | 3.35            | 2.69                 |
| 4/5                      | 3                    | 1   | 0    | II           |                      | 0.56              | 11.16                 | 4.21            | 0.47                 |
| 4/6                      | 2                    | 1   | 0    | II           |                      | 0.46              | 7.32                  | 5.40            | 0.36                 |
| 5/7                      | 2                    | 1   | 0    | II           |                      | 0.68              | 16.20                 | 4.56            | 0.57                 |
| 5/8                      | 3                    | 1   | 0    | II           |                      | 0.90              | 19.75                 | 3.71            | 0.50                 |
| 6/9                      | 2                    | 1   | 0    | II           |                      | 0.62              | 20.48                 | 3.47            | 0.40                 |
| 7/10                     | 1                    | 3   | 0    | II           | -                    | 2.09              | 53.73                 | 3.39            | 0.87                 |
| 8/11                     | 1                    | 1   | 3    | IV           | +                    | 0.80              | 14.23                 | 4.37            | 0.81                 |
| 8/12                     | 3                    | 1   | 3    | IV           | +                    | 1.69              | 46.02                 | 2.61            | 1.75                 |
| 9/13                     | 2                    | 2   | 3    | IV           | +                    | 1.77              | 83.78                 | 1.32            | 5.57                 |
| 9/14                     | 2                    | 2   | 0    | -            | +                    | 1.02              | 27.51                 | 2.50            | 0.65                 |
| 10/15                    | 1                    | 2   | 0    | I            | -                    | 0.91              | 6.38                  | 9.17            | 0.58                 |
| 11/16                    | 1                    | 2   | 0    | II           | -                    | 2.66              | 30.96                 | 6.38            | 0.36                 |
| 12/17                    | 3                    | 3   | 0    | II           | +                    | 2.11              | 59.48                 | 2.69            | 0.7                  |
| 12/18                    | 1                    | 2   | 0    | II           | +                    | 0.98              | 37.04                 | 1.76            | 0.09                 |
| 13/19                    | 2                    | 1   | 0    | II           | -                    | 1.22              | 28.68                 | 3.27            | 0.5                  |
| 14/20                    | 2                    | 1   | 0    | II           | -                    | 0.82              | 23.72                 | 2.47            | 0.88                 |
| 15/21                    | 2                    | 2   | 0    | II           | -                    | 0.99              | 46.69                 | 1.39            | 0.21                 |
| 16/22                    | 1                    | 1   | 0    | II           | +                    | 0.66              | 14.25                 | 3.75            | 1.39                 |
| 16/23                    | 1                    | 1   | 0    | II           | +                    | 1.26              | 11.36                 | 7.29            | 0.11                 |
| 17/24                    | 3                    | 3   | 2    | IV           | +                    | 7.63              | 288.8                 | 1.65            | 9.29                 |
| 17/25                    | 3                    | 3   | 2    | IV           | +                    | 6.98              | 216.77                | 2.18            | 10.04                |
| 17/26                    | 3                    | 3   | 2    | IV           | +                    | 6.41              | 214.51                | 1.98            | 5.58                 |
| 18/27                    | 1                    | 1   | 1    | II           | +                    | 1.04              | 13.21                 | 9.74            | 3.05                 |
| 18/28                    | 3                    | 3   | 3    | IV           | +                    | 1.62              | 54.46                 | 2.65            | 5.29                 |
| 19/29                    | 2                    | 2   | 0    | II           | -                    | 0.665             | 17.8                  | 2.4             | 0.45                 |
| 20/30                    | 2                    | 2   | 0    | III          | -                    | 1.32              | 13.65                 | 7.78            | 0.037                |
| 21/31                    | 3                    | 2   | 0    | II           | +                    | 2.03              | 22.49                 | 6.56            | 0.347                |
| 21/32                    | 1                    | 1   | 0    | II           | +                    | 1.38              | 27.59                 | 4.77            | 0.947                |
| 21/33                    | 3                    | 2   | 0    | II           | +                    | 0.927             | 9.96                  | 7.16            | 0.224                |
| 22/34                    | 3                    | 2   | 0    | III          | +                    | 2.41              | 60.2                  | 2.72            | 3.43                 |
| 23/35                    | 3                    | 2   | 0    | II           |                      | 1.22              | 38.09                 | 2.78            | 0.64                 |
| 23/36                    | 3                    | 3   | 2    | III          | -                    | 1.84              | 13.91                 | 10.49           | 1.15                 |

<sup>a</sup> + indicates positive staining of vessels; -, negative staining of vessels.
